# Supplementary material
Source: ML conference proceedings conference paper supplement (https://proceedings.neurips.cc/paper_files/paper/2019/hash/a9cc6694dc40736d7a2ec018ea566113-Abstract.html)
Supplement: Supplementary file [file a9cc6694dc40736d7a2ec018ea566113-Supplemental.zip]

---

# Supplementary material for paper Sliced Gromov-Wasserstein

---

**Notations** In the following  $\mathcal{F}$  denotes the Fourier transform. For a probability measure  $\mu \in \mathcal{P}(\mathbb{R}^p)$  and for  $s \in \mathbb{R}^p$ , it is defined by  $\mathcal{F}_\mu(s) = \int e^{-2i\pi\langle s, x \rangle} d\mu(x)$ .

## 1 Proof for the QAP

In this section we aim at proving the new special case of the QAP, which is recalled in the next theorem:

**Theorem 1.1.** *A new special case of the QAP. For real numbers  $x_1 \leq \dots \leq x_n$  and  $y_1 \leq \dots \leq y_n$  then*

$$\min_{\sigma \in S_n} \sum_{i,j} \left( (x_i - x_j)^2 - (y_{\sigma(i)} - y_{\sigma(j)})^2 \right)^2 \quad (1)$$

*is achieved either by the identity permutation  $\sigma(i) = i$  or the anti-identity permutation  $\sigma(i) = n + 1 - i$ .*

*Proof.* Let us note  $\mathcal{I} = \{x, y \in \mathbb{R}^n \times \mathbb{R}^n \mid x_1 \leq x_2 \leq \dots \leq x_n, y_1 \leq y_2 \leq \dots \leq y_n\}$  and  $S_n$  the set of all permutations of  $\{1, \dots, n\}$ . We consider for  $x, y \in \mathcal{I}$ :

$$\max_{\sigma \in S_n} Z(x, y, \sigma) = \max_{\sigma \in S_n} \sum_{i,j} (x_i - x_j)^2 (y_{\sigma(i)} - y_{\sigma(j)})^2 \quad (2)$$

The original problem is equivalent to maximizing  $Z(x, y, \sigma)$  over  $S_n$ . For any  $x, y \in \mathcal{I}$ , we recall the rearrangement inequality:

$$\forall \sigma \in S_n, \sum_i x_i y_{n+1-i} \leq \sum_i x_i y_{\sigma(i)} \leq \sum_i x_i y_i \quad (3)$$

We will prove that it suffices to solve a problem of the form  $\arg\max_{\sigma \in S_n} (\sum_i x_i y_{\sigma(i)})^2$  in order to recover the optimal solution.

Now, given  $x, y \in \mathcal{I}$ , we define  $X \stackrel{\text{def}}{=} \sum_i x_i$  and  $Y \stackrel{\text{def}}{=} \sum_i y_i$ . Then:

$$\begin{aligned}
\max_{\sigma \in S_n} Z(x, y, \sigma) &= \max_{\sigma \in S_n} \sum_{i,j} (x_i - x_j)^2 (y_{\sigma(i)} - y_{\sigma(j)})^2 \\
&= \max_{\sigma \in S_n} \sum_{i,j} (x_i^2 + x_j^2)(y_{\sigma(i)}^2 + y_{\sigma(j)}^2) - 2 \sum_{i,j} x_i x_j (y_{\sigma(i)}^2 + y_{\sigma(j)}^2) - 2 \sum_{i,j} y_{\sigma(i)} y_{\sigma(j)} (x_i^2 + x_j^2) \\
&\quad + 4 \sum_{i,j} x_i x_j y_{\sigma(i)} y_{\sigma(j)} \\
&= \max_{\sigma \in S_n} 2n \sum_i x_i^2 y_{\sigma(i)}^2 - 2 \sum_{i,j} x_i x_j (y_{\sigma(i)}^2 + y_{\sigma(j)}^2) - 2 \sum_{i,j} y_{\sigma(i)} y_{\sigma(j)} (x_i^2 + x_j^2) \\
&\quad + 4 \sum_{i,j} x_i x_j y_{\sigma(i)} y_{\sigma(j)} + 2(\sum_i x_i^2)(\sum_i y_i^2) \\
&= \max_{\sigma \in S_n} 2n \sum_i x_i^2 y_{\sigma(i)}^2 - 4X \sum_i x_i y_{\sigma(i)}^2 - 4Y \sum_i x_i^2 y_{\sigma(i)} + 4 \sum_{i,j} x_i x_j y_{\sigma(i)} y_{\sigma(j)} + 2(\sum_i x_i^2)(\sum_i y_i^2) \\
&\stackrel{(*)}{=} C + 2(\max_{\sigma \in S_n} \sum_i n x_i^2 y_{\sigma(i)}^2 - 2 \sum_i (X x_i y_{\sigma(i)}^2 + Y x_i^2 y_{\sigma(i)}) + 2(\sum_i x_i y_{\sigma(i)})^2)
\end{aligned}$$

where in (\*) we defined  $C \stackrel{\text{def}}{=} 2(\sum_i x_i^2)(\sum_i y_i^2)$  the term that does not depend on  $\sigma$ . We define

$$W(x, y, \sigma) \stackrel{\text{def}}{=} \sum_i n x_i^2 y_{\sigma(i)}^2 - 2(X x_i y_{\sigma(i)}^2 + Y x_i^2 y_{\sigma(i)}) + 2(\sum_i x_i y_{\sigma(i)})^2$$

and

$$f(x_i, y_{\sigma(i)}) \stackrel{\text{def}}{=} n x_i^2 y_{\sigma(i)}^2 - 2(X x_i y_{\sigma(i)}^2 + Y x_i^2 y_{\sigma(i)}) = n x_i^2 y_{\sigma(i)}^2 - 2((\sum_i x_i) x_i y_{\sigma(i)}^2 + 4(\sum_i y_i) x_i^2 y_{\sigma(i)})$$

such that:

$$W(x, y, \sigma) = \sum_i f(x_i, y_{\sigma(i)}) + 2(\sum_i x_i y_{\sigma(i)})^2$$

With these new definitions we have proven:

$$\forall x, y \in \mathcal{I}, \quad \operatorname{argmax}_{\sigma \in S_n} Z(x, y, \sigma) = \operatorname{argmax}_{\sigma \in S_n} W(x, y, \sigma) = \operatorname{argmax}_{\sigma \in S_n} \sum_i f(x_i, y_{\sigma(i)}) + 2(\sum_i x_i y_{\sigma(i)})^2 \quad (4)$$

We also introduce for  $x, y \in \mathcal{I}$ ,  $b \in \mathbb{R}$ :

$$g(x, y, b) \stackrel{\text{def}}{=} \sum_i f(x_i + b, y_{\sigma(i)})$$

which is a perturbed version of the cost by a constant  $b$ . Since we know that the original cost  $Z(x, y, \sigma)$  is invariant by any translation of the points  $x, y$  the idea is to find a constant  $b^*$  such that  $g(x, y, b^*) = 0$  to simplify the problem. We have:

$$g(x, y, b) = -(n\|x\|_2^2 + 2Y^2)b^2 - (4Y \sum_i [x_i y_{\sigma(i)}] + 2X\|x\|_2^2)b + \sum_i x_i y_{\sigma(i)} (n x_i y_{\sigma(i)} - 2X y_{\sigma(i)} - 2Y x_i)$$

with  $\|x\|_2^2 = \sum_i x_i^2$ . Indeed:

$$\begin{aligned}
g(x, y, b) &= \sum_i f(x_i + b, y_{\sigma(i)}) = \sum_i n(x_i + b)^2 y_{\sigma(i)}^2 - 2((X + nb)(x_i + b) y_{\sigma(i)}^2 + Y(x_i + b)^2 y_{\sigma(i)}) \\
&= \sum_i n(x_i^2 + 2bx_i + b^2) y_{\sigma(i)}^2 - 2((X x_i + Xb + nbx_i + nb^2) y_{\sigma(i)}^2 + Y(x_i^2 + 2bx_i + b^2) y_{\sigma(i)}) \\
&= \sum_i b^2 [n y_{\sigma(i)}^2 - 2n y_{\sigma(i)}^2 - 2Y y_{\sigma(i)}] \\
&\quad + \sum_i b [2n x_i y_{\sigma(i)}^2 - 2X y_{\sigma(i)}^2 - 2n x_i y_{\sigma(i)}^2 - 4Y x_i y_{\sigma(i)}] \\
&\quad + \sum_i [n x_i^2 y_{\sigma(i)}^2 - 2X x_i y_{\sigma(i)}^2 - 2Y x_i^2 y_{\sigma(i)}] \\
&= -(n\|x\|_2^2 + 2Y^2)b^2 - (4Y \sum_i x_i y_{\sigma(i)} + 2X\|x\|_2^2)b + \sum_i x_i y_{\sigma(i)} (n x_i y_{\sigma(i)} - 2X y_{\sigma(i)} - 2Y x_i)
\end{aligned}$$

If  $X, Y = 0$  then  $g(x, y, b) = 0 \iff b = b^*(x, y, \sigma) = \frac{1}{\|x\|_2} \sqrt{\sum_i x_i^2 y_{\sigma(i)}^2}$ .

In this way for  $x, y \in \mathcal{I}$  with  $X, Y = 0$  using (4):

$$\begin{aligned}
W(x + b^*(x, y, \sigma)1_n, y, \sigma) &= g(x, y, b^*(x, y, \sigma)) + 2\left(\sum_i (x_i + b^*(x, y, \sigma))y_{\sigma(i)}\right)^2 \\
&= 2\left(\sum_i (x_i y_{\sigma(i)} + b^*(x, y, \sigma)y_{\sigma(i)})\right)^2 \\
&= 2\left(\sum_i x_i y_{\sigma(i)} + b^*(x, y, \sigma) \sum_i y_{\sigma(i)}\right)^2 \\
&= 2\left(\sum_i x_i y_{\sigma(i)} + b^*(x, y, \sigma)Y\right)^2 \\
&= 2\left(\sum_i x_i y_{\sigma(i)}\right)^2
\end{aligned} \tag{5}$$

Moreover for  $x, y \in \mathcal{I}$  we have by invariance of the cost *w.r.t.* any translation:

$$\begin{aligned}
\operatorname{argmax}_{\sigma \in S_n} Z(x, y, \sigma) &= \operatorname{argmax}_{\sigma \in S_n} Z\left(x - \frac{1}{n} \sum_i x_i, y - \frac{1}{n} \sum_i y_i, \sigma\right) \\
&= \operatorname{argmax}_{\sigma \in S_n} Z(x', y', \sigma)
\end{aligned}$$

with  $x', y' \in \mathcal{I}$  and  $\sum_i x'_i = \sum_i y'_i = 0$ . So without loss of generality we can solve the original problem only for  $x, y \in \mathcal{I}$  with  $X, Y = 0$ . In this case:

$$\begin{aligned}
\operatorname{argmax}_{\sigma \in S_n} Z(x, y, \sigma) &\stackrel{*}{=} \operatorname{argmax}_{\sigma \in S_n} Z(x + b^*(x, y, \sigma)1_n, y, \sigma) \\
&\stackrel{**}{=} \operatorname{argmax}_{\sigma \in S_n} W(x + b^*(x, y, \sigma)1_n, y, \sigma) \\
&\stackrel{***}{=} \operatorname{argmax}_{\sigma \in S_n} \left(\sum_i x_i y_{\sigma(i)}\right)^2
\end{aligned} \tag{6}$$

Where in (\*) we used the translation invariance property of  $Z$ , in (\*\*) we used (4) and in (\*\*\*) we used (5)

Now let us discuss the term  $(\sum_i x_i y_{\sigma(i)})^2$  with the rearrangement inequality (3):

- If  $\sum_i x_i y_{n+1-i} \geq 0$ , then everything is positive in (3) so that we have  $(\sum_i x_i y_{\sigma(i)})^2 \leq (\sum_i x_i y_i)^2$  for any  $\sigma \in S_n$ . In this case the identity is the optimal permutation.
- If  $\sum_i x_i y_i \leq 0$  then everything is negative in (3) so that we have  $(\sum_i x_i y_{\sigma(i)})^2 \leq (\sum_i x_i y_{n+1-i})^2$ . In this case the anti-identity is the optimal permutation.
- If  $\sum_i x_i y_{n+1-i} < 0$  and  $\sum_i x_i y_i > 0$  then using (3) again,

$$\left(\sum_i x_i y_{\sigma(i)}\right)^2 \leq \max\left\{\left(\sum_i x_i y_{n+1-i}\right)^2, \left(\sum_i x_i y_i\right)^2\right\}$$

In this case the optimal permutation is achieved whether by the identity or the anti-identity permutation.

□

## 2 Computing $GW$ in the 1d case

As seen in the previous theorem finding the optimal permutation  $\sigma^*$  can be found in  $O(n \log(n))$ . Moreover the final cost can be written using binomial expansion:

$$\begin{aligned}
\sum_{i,j} ((x_i - x_j)^2 - (y_{\sigma^*(i)} - y_{\sigma^*(j)})^2)^2 &= 2n \sum_i x_i^4 - 8 \sum_i x_i^3 \sum_i x_i + 6(\sum_i x_i^2)^2 \\
&+ 2n \sum_i y_i^4 - 8 \sum_i y_i^3 \sum_i y_i + 6(\sum_i y_i^2)^2 \\
&- 4(\sum_i x_i)^2 (\sum_i y_i)^2 \\
&- 4n \sum_i x_i^2 y_{\sigma^*(i)}^2 + 8 \sum_i ((\sum_i x_i) x_i y_{\sigma^*(i)}^2 + (\sum_i y_i) x_i^2 y_{\sigma^*(i)}) \\
&- 8(\sum_i x_i y_{\sigma^*(i)})^2
\end{aligned} \tag{7}$$

which can be computed in  $O(n)$  operations.

## 3 Claims about $GW$

This section aims at proving some claims in the paper about  $GW$ . Let us recall the notations of the paper.

We consider discrete measures  $\mu \in \mathcal{P}(\mathbb{R}^p)$  and  $\nu \in \mathcal{P}(\mathbb{R}^q)$  with  $p \leq q$  on euclidean spaces such that  $\mu = \sum_{i=1}^n a_i \delta_{x_i}$  and  $\nu = \sum_{j=1}^m b_j \delta_{y_j}$ , where  $a \in \Sigma_n$  and  $b \in \Sigma_m$  are histograms.

Let  $c_X : \mathbb{R}^p \times \mathbb{R}^p \mapsto \mathbb{R}_+$  (resp.  $c_Y : \mathbb{R}^q \times \mathbb{R}^q \mapsto \mathbb{R}_+$ ) measuring the similarity between the points in  $\mu$  (resp.  $\nu$ ). The Gromov-Wasserstein ( $GW$ ) distance is defined as:

$$GW_2^2(c_X, c_Y, \mu, \nu) = \min_{\pi \in \Pi(a,b)} J(c_X, c_Y, \pi) \tag{8}$$

where

$$J(c_X, c_Y, \pi) = \sum_{i,j,k,l} |c_X(x_i, x_k) - c_Y(y_j, y_l)|^2 \pi_{i,j} \pi_{k,l}$$

### 3.1 $GW$ when squared euclidean distances are used

When  $c_X, c_Y$  are distances it has been shown in [1] that  $GW$  defines a distance on the space of metric measure spaces quotiented by the measure-preserving isometries. More precisely,  $GW$  is symmetric, satisfies the triangle inequality and  $GW_2^2(c_X, c_Y, \mu, \nu) = 0$  iff there exists  $f : \text{supp}(\mu) \rightarrow \text{supp}(\nu)$  such that

$$f \# \mu = \nu \tag{9}$$

$$\forall x, x' \in \text{supp}(\mu)^2, c_X(x, x') = c_Y(f(x), f(x')) \tag{10}$$

In the paper we claim the following lemma:

**Lemma 3.1.** Using previous notations with  $c_X(x, x') = \|x - x'\|_{2,p}^2$ ,  $c_Y(y, y') = \|y - y'\|_{2,q}^2$ . Then  $GW_2^2(c_X, c_Y, \mu, \nu) = 0$  iff there exists a measure preserving isometry from  $\text{supp}(\mu)$  to  $\text{supp}(\nu)$  which satisfies (9) and (10)

*Proof.* If such a function exists by considering the coupling  $\pi = (I_d \times f) \# \mu$  it is clear that  $\pi$  is optimal and has a null cost so that  $GW_2^2(c_X, c_Y, \mu, \nu) = 0$ . Conversely,  $GW_2^2(c_X, c_Y, \mu, \nu) = 0$

implies that  $c_X(x, x') = c_Y(y, y')$  for all  $(x, y), (x', y')$  in the support of an optimal plan  $\pi^*$ . This suffices to prove the existence of a measure preserving isometry (see (a) in Proof of Theorem 5.1 in [1])  $\square$

### 3.2 Equivalence between $GM$ and $GW$ in the discrete case

This paragraph aims at proving the equivalence between  $GM$  and  $GW$ . We will prove the following theorem (that is more general than the one used in the paper which only considers one-dimensional measures):

**Theorem 3.2.** *Equivalence between  $GW$  and  $GM$  for discrete measures*

With  $\mu, \nu$  defined previously and  $c_X(x, x') = \|x - x'\|_{2,p}^2$ ,  $c_Y(y, y') = \|y - y'\|_{2,q}^2$ . Let us suppose also that  $m = n$  and  $\forall i \in \{1, \dots, n\}, a_i = b_i = \frac{1}{n}$

Then  $GW_2(c_X, c_Y, \mu, \nu) = GM_2(c_X, c_Y, \mu, \nu)$ .

*Proof.* The proof is essentially based on theoretical results from [2]. This paper considers the following energy minimizing problem:

$$\min_{X \in \mathcal{F}} E(X) \quad (11)$$

where  $\mathcal{F} \subset \mathbb{R}^{n \times n}$  is a collection of matchings between the vertices of two graphs. More precisely the paper focuses on  $E(X)$  of the form  $E(X) = -\text{tr}(BX^TAX)$  and  $\mathcal{F} = S_n$  the set of all permutations of  $\{1, \dots, n\}$ . In fact, the  $GM$  problem defined in the paper is equivalent to (11) by considering  $A_{ij} = \|x_i - x_j\|_{2,p}^2$  and  $B_{ij} = \|y_i - y_j\|_{2,q}^2$

Authors consider the set of doubly stochastic matrices (which is the convex-hull of  $S_n$ ):

$$DS = \{X \in \mathbb{R}^{n \times n} \text{ s.t. } X1 = X^T1 = 1, X \geq 0\}$$

Minimizing  $E(X)$  over  $DS$  is equivalent to solving the  $GW$  distance when  $a_i = b_j = \frac{1}{n}$ . The paper claims that if  $E(X)$  is a *conditionally concave energy* then  $\min_{X \in S_n} E(X)$  and  $\min_{X \in DS} E(X)$  coincide.

This is verified when both  $A$  and  $B$  are conditionally positive (or negative) definite of order 1 (Theo 1 in [2]). Yet  $A$  and  $B$  defined previously satisfy this property (see examples under Definition 2 in [2]) and so  $GW$  and  $GM$  coincide.  $\square$

## 4 Properties of SGW

$\|\cdot\|$  is a norm on  $\mathbb{R}^p$ . To state the properties of  $SGW$ , we will need the Arzela-Ascoli Theorem. Let  $(X, d)$  be a compact metric space and  $C(X, \mathbb{R}^p)$  the space of all continuous functions from  $X$  to  $\mathbb{R}^p$ . We recall:

- A family  $\mathcal{F} \subset C(X, \mathbb{R}^p)$  is *bounded* means that there exists a positive constant  $M < \infty$  such that  $\|f(x)\| \leq M$  for all  $x \in X$  and  $f \in \mathcal{F}$
- A family  $\mathcal{F} \subset C(X, \mathbb{R}^p)$  is *equicontinuous* means that for every  $\epsilon > 0$  there exists  $\delta > 0$  (which depends only on  $\epsilon$ ) such that for  $x, y \in X$ :

$$d(x, y) < \delta \Rightarrow \|f(x) - f(y)\| < \epsilon \quad \forall f \in \mathcal{F}.$$

The Arzela-Ascoli Theorem states that if  $(f_n)_{n \in \mathbb{N}}$  is a sequence in  $C(X, \mathbb{R}^p)$  that is bounded and equicontinuous then it has a uniformly convergent subsequence.

We recall the theorem (measures  $\mu$  and  $\nu$  are defined discrete measures with the same number of atoms):

**Theorem 4.1.** *Properties of  $SGW$*

- For all  $\Delta$ ,  $SGW_\Delta$  and  $RISGW$  are translation invariant.  $RISGW$  is also rotational invariant when  $p = q$ , more precisely if  $Q \in \mathcal{O}(p)$  is an orthogonal matrix,  $RISGW(Q\#\mu, \nu) = RISGW(\mu, \nu)$
- $SGW$  and  $RISGW$  are pseudo-distances on  $\mathcal{P}(\mathbb{R}^p)$ , i.e they are symmetric, satisfy the triangle inequality and  $SGW(\mu, \mu) = RISGW(\mu, \mu) = 0$ .
- For  $\mu, \nu \in \mathcal{P}(\mathbb{R}^p) \times \mathcal{P}(\mathbb{R}^p)$ , if  $SGW(\mu, \nu) = 0$  then  $\mu$  and  $\nu$  are isomorphic for the distance induced by the  $\ell_1$  norm on  $\mathbb{R}^p$ . In particular this implies  $GW_2(d_{\|\cdot\|_{1,p}}, \mu, \nu) = 0$ .

The invariance by translation is clear since the costs are invariant by translation of the support of the measures. The pseudo-distances properties are straightforward thanks to the properties of  $GW$ .

**Theorem 4.2.** For  $\mu, \nu \in \mathcal{P}(\mathbb{R}^p) \times \mathcal{P}(\mathbb{R}^p)$ , if  $SGW(\mu, \nu) = 0$  then  $\mu$  and  $\nu$  are isomorphic for the distance induced by the  $\ell_1$  norm on  $\mathbb{R}^p$ . In particular this implies that  $GW_2(d_{\|\cdot\|_{1,p}}, \mu, \nu) = 0$ .

*Proof.* In the proof  $\|\cdot\|$  denotes the  $\ell_1$  norm and  $\|\cdot\|_2$  denotes the  $\ell_2$  norm. We note  $M_\mu = \max_{x \in \text{supp}(\mu)} \|x\|_2$  and  $M_\nu = \max_{y \in \text{supp}(\nu)} \|y\|_2$ . The objective is to prove that if  $SGW(\mu, \nu) = 0$  there exists a surjective function  $f : \text{supp}(\mu) \rightarrow \text{supp}(\nu)$  such that  $f$  is an isometry for the  $\ell_1$  norm ( $\forall x, x' \in \text{supp}(\mu), \|f(x) - f(x')\| = \|x - x'\|$ ) and pushes  $\mu$  into  $\nu$  ( $f\#\mu = \nu$ ).

The proof is divided into four parts. In the first one, we construct an "almost orthogonal" basis on which measures are isomorphic. Building upon this result we define a sequence of functions from  $\text{supp}(\mu)$  to  $\text{supp}(\nu)$  and show that it has a convergent subsequence. We conclude by proving that the limit of the subsequence is actually a good candidate for being the isometry we are looking for.

**There exists an "almost orthogonal" basis on which measures are isomorphic** Suppose that  $SGW(\mu, \nu) = 0$ . Then by the Gromov-Wasserstein properties for almost all  $\theta \in \mathbf{S}^{p-1}$ :

$$\begin{aligned} \exists T_\theta : \mathbb{R} &\mapsto \mathbb{R}, \text{ surjective s.t. } T_\theta\#(P_\theta\#\mu) = P_\theta\#\nu \\ \forall x, x' \in \text{supp}(P_\theta\#\mu), &|T_\theta(x) - T_\theta(x')| = |x - x'| \end{aligned} \quad (\mathcal{Q}_\theta)$$

We want to construct a basis  $(e_1, \dots, e_p)$  as orthogonal as possible such that for all  $i$  we have  $\mathcal{Q}_{e_i}$ . In order to do so, we consider for  $n \in \mathbb{N}^*$ ,

$$\mathcal{B}_p^n = \{(e_1, \dots, e_p) \in (\mathbf{S}^{p-1})^p \text{ s.t. } |\langle e_i, e_j \rangle| < \frac{1}{n}\}$$

and

$$Q = \{(e_1, \dots, e_p) \in (\mathbf{S}^{p-1})^p \text{ s.t. } \forall i \in \{1, \dots, p\}, \mathcal{Q}_{e_i}\}$$

We also note  $\lambda_{p-1}^{\otimes p}$  the product measure  $\lambda_{p-1} \otimes \dots \otimes \lambda_{p-1}$ .  $\mathcal{B}_p^n$  is an open set as inverse image by a continuous function of an open set. Then  $\lambda_{p-1}^{\otimes p}(\mathcal{B}_p^n) > 0$ . Moreover, since for almost all  $\theta \in \mathbf{S}^{p-1}$  we have  $\mathcal{Q}_\theta$  then  $\lambda_{p-1}^{\otimes p}(Q) > 0$  and so  $\lambda_{p-1}^{\otimes p}(\mathcal{B}_p^n \cap Q) > 0$ .

In this way we can consider  $(e_1(n), \dots, e_p(n)) \in \mathcal{B}_p^n \cap Q$ . If  $n > p - 1$  the Gram matrix of  $(e_1(n), \dots, e_p(n))$  is strictly diagonal dominant, thus invertible, such that  $(e_1(n), \dots, e_p(n))$  is a basis. In the following  $n > p - 1$  and  $(e_1(n), \dots, e_p(n))$  is the basis constructed with the previous procedure. The idea is to construct the isometry thanks to this "almost" orthogonal basis.

In the proof  $x_i$  denotes the  $i$ th coordinate of  $x$  in the standard euclidean basis. For  $x \in \mathbb{R}^p$ , we can write in the new basis:

$$x = \sum_{i=1}^p [\langle x, e_i(n) \rangle + R(x, e_i(n))] e_i$$

with  $R(x, e_i(n)) \stackrel{\text{def}}{=} x_i - \langle x, e_i(n) \rangle$  and  $|R(x, e_i(n))| = o(\frac{1}{n})$ .

Indeed,

$$\begin{aligned}
x = \sum_{i=1}^p x_i e_i &\implies \text{for } j \langle x, e_j \rangle = \sum_{i=1}^p x_i \langle e_i, e_j \rangle \\
&\implies x_j - \langle x, e_j \rangle = \sum_{i \neq j} x_i \langle e_i, e_j \rangle \\
&\implies |R(x, e_j(n))| = \left| \sum_{i \neq j} x_i \langle e_i, e_j \rangle \right| \\
&\implies |R(x, e_j(n))| \leq \frac{1}{n} \sum_{i \neq j} |x_i| \leq \frac{C_{p,\mu}}{n}
\end{aligned}$$

with some constant  $C_{p,\mu}$  that only depends on  $\mu$  and  $p$  (it is actually in the form  $C * M_\mu$  since all norms are equivalent). Also in the same way for  $s, y \in \mathbb{R}^p \times \mathbb{R}^p$  we can rewrite their scalar product:

$$\langle s, y \rangle = \sum_{i=1}^p \langle s, e_i(n) \rangle \langle y, e_i(n) \rangle + \tilde{R}(s, y) \quad (12)$$

with:

$$\begin{aligned}
\tilde{R}(s, y) &\stackrel{\text{def}}{=} \langle s, y \rangle - \sum_{i=1}^p \langle s, e_i(n) \rangle \langle y, e_i(n) \rangle = \sum_{i \neq j} \langle s, e_i(n) \rangle \langle y, e_i(n) \rangle \langle e_j(n), e_i(n) \rangle \\
&\quad + \sum_{i,j} \langle s, e_i(n) \rangle R(y, e_j(n)) \langle e_j(n), e_i(n) \rangle \\
&\quad + \sum_{i,j} \langle y, e_j(n) \rangle R(s, e_i(n)) \langle e_j(n), e_i(n) \rangle \\
&\quad + \sum_{i,j} R(y, e_j(n)) R(s, e_i(n)) \langle e_j(n), e_i(n) \rangle
\end{aligned}$$

and with the same calculus than for  $R$  we have  $|\tilde{R}(s, y)| = o(\frac{1}{n})$ .

**Construction of a "good" sequence** Using previous notations we define:

$$\forall n > p-1, \forall x \in \text{supp}(\mu), f_n(x) = (T_{e_1(n)}(\langle x, e_1(n) \rangle), \dots, T_{e_p(n)}(\langle x, e_p(n) \rangle)) \quad (13)$$

Clearly all  $f_n$  are surjectives and continuous since all  $T_{e_k(n)}$  are, thanks to  $\mathcal{Q}_{e_k(n)}$ . We will show that we can derive from  $(f_n)_{n \in \mathbb{N}}$  a good candidate for being the isometry we are looking for. The sequence satisfies the following properties:

*Lemma 4.3.* Properties of  $(f_n)_{n \in \mathbb{N}}$

$$\forall n \in \mathbb{N}, \forall x, x' \in \text{supp}(\mu)^2, \left| \|f_n(x) - f_n(x')\| - \|x - x'\| \right| = o\left(\frac{1}{n}\right) \quad (14)$$

$$\forall s \in \mathbb{R}^p, |\mathcal{F}_{f_n \# \mu}(s) - \mathcal{F}_\nu(s)| = o\left(\frac{1}{n}\right) \quad (15)$$

For clarity purposes, we prove this lemma at the end of the proof. In the next paragraph we will show that we can extract a convergent subsequence from  $(f_n)_{n \in \mathbb{N}}$  thanks to Arzela-Ascoli Theorem.

**We can extract from  $(f_n)_{n \in \mathbb{N}}$  a convergent subsequence** We will show that  $(f_n)_{n \in \mathbb{N}}$  is equicontinuous. Let  $\epsilon > 0$ , using (14) there exists a  $N \in \mathbb{N}$  such that we have for all  $x, x' \in \text{supp}(\mu)$ :

$$\|f_n(x) - f_n(x')\| \leq \epsilon + \|x - x'\| \text{ for all } n \geq N$$

Now let  $\delta < \epsilon$ . Suppose that  $\|x - x'\| < \delta$  then

$$\|f_n(x) - f_n(x')\| < \epsilon + \delta < 2\epsilon \text{ for all } n \geq N$$

Without loss of generality we can reindex  $(f_n)_{n \in \mathbb{N}}$  for  $n$  large enough ( $n \geq N$ ) so that  $(f_n)_{n \in \mathbb{N}}$  is equicontinuous with the previous argument.

Moreover  $(f_n)_{n \in \mathbb{N}}$  is also bounded. Indeed for all  $n \in \mathbb{N}$  since  $T_{e_k(n)}$  is a surjective isometry from  $\text{supp}(P_{e_k(n)} \# \mu)$  to  $\text{supp}(P_{e_k(n)} \# \nu)$  then it is necessarily a bijection. So for all  $x \in \text{supp}(\mu)$  there exists a  $y_0(x, n) \in \text{supp}(\nu)$  such that  $T_{e_k(n)}(\langle x, e_k(n) \rangle) = \langle y_0(x, n), e_k(n) \rangle$ . In this way  $|T_{e_k(n)}(\langle x, e_k(n) \rangle)| = |\langle y_0(x, n), e_k(n) \rangle| \leq \|y_0(x, n)\|_2 \leq M_\nu$  by Cauchy-Swartz.

So we have for  $n \in \mathbb{N}$ ,  $x \in \text{supp}(\mu)$ ,

$$\|f_n(x)\|_2^2 = \sum_{k=1}^p |T_{e_k(n)}(\langle x, e_k(n) \rangle)|^2 \leq pM_\nu$$

Since on  $\mathbb{R}^p$  all norms are equivalent it is sufficient to state the existence of a constant  $C$  such that  $\forall x \in \mathbb{R}^p, n \in \mathbb{N}, \|f_n(x)\| \leq C$ .

To summarize  $(f_n)_{n \in \mathbb{N}}$  is a bounded and equicontinuous sequence so by Arzela-Ascoli Theorem  $(f_n)_{n \in \mathbb{N}}$  has a uniformly convergent subsequence:  $f_{\phi(n)} \xrightarrow[n \rightarrow \infty]{u} f$

Moreover eq. (4) states that for all  $s \in \mathbb{R}^p$ ,  $\mathcal{F}_{f_n \# \mu}(s) \xrightarrow[n \rightarrow \infty]{} \mathcal{F}_\nu(s)$ . In this way  $(\mathcal{F}_{f_n \# \mu}(s))_{n \in \mathbb{N}}$  is a convergent real valued sequence, so every adherence value goes to the same limit, hence  $\mathcal{F}_{f_{\phi(n)} \# \mu}(s) \xrightarrow[n \rightarrow \infty]{} \mathcal{F}_\nu(s)$ .

**The function  $f$  is a measure preserving isometry from  $\text{supp}(\mu)$  to  $\text{supp}(\nu)$**  Let  $\epsilon_1 > 0, s \in \mathbb{R}^p$ , there exists from previous statements  $N_0, N_1 \in \mathbb{N}$  such that for  $n \geq N_0$ ,  $|\mathcal{F}_{f_{\phi(n)} \# \mu}(s) - \mathcal{F}_\nu(s)| < \epsilon_1$  and  $n \geq N_1$ ,  $|\mathcal{F}_{f_{\phi(n)} \# \mu}(s) - \mathcal{F}_{f \# \mu}(s)| < \epsilon_1$ .

Let  $n \geq \max(N_0, N_1)$

$$|\mathcal{F}_{f \# \mu}(s) - \mathcal{F}_\nu(s)| \leq |\mathcal{F}_{f_{\phi(n)} \# \mu}(s) - \mathcal{F}_\nu(s)| + |\mathcal{F}_{f_{\phi(n)} \# \mu}(s) - \mathcal{F}_{f \# \mu}(s)| < 2\epsilon_1$$

As this result holds true for any  $\epsilon_1 > 0$  we have  $\mathcal{F}_{f \# \mu}(s) = \mathcal{F}_\nu(s)$  and by injectivity of the Fourier transform  $f \# \mu = \nu$  such that  $f$  is measure preserving.

In the same way for any  $x, x' \in \text{supp}(\mu)$ ,  $\epsilon_2 > 0$  and  $n$  large enough

$$\begin{aligned} \left| \|f(x) - f(x')\| - \|x - x'\| \right| &\leq \left| \|f_{\phi(n)}(x) - f_{\phi(n)}(x')\| - \|f(x) - f(x')\| \right| \\ &\quad + \left| \|f_{\phi(n)}(x) - f_{\phi(n)}(x')\| - \|x - x'\| \right| \\ &< 2\epsilon_2 \end{aligned}$$

using  $f_{\phi(n)} \xrightarrow[n \rightarrow \infty]{u} f$  and (14). As this result holds true for any  $\epsilon_2 > 0$  we have  $\|f(x) - f(x')\| = \|x - x'\|$  for any  $x, x' \in \text{supp}(\mu)$ .

To conclude  $f$  is a surjective isometry that preserves the measures so  $\mu$  and  $\nu$  are isomorphic. By the properties of  $GW$  the Gromov-Wasserstein distance defined previously also vanishes.

□

In the previous proof we admitted the lemma 4.3 that we now prove:

*Proof.* Proof of Lemma 4.3

We have to show that:

$$\forall n \in \mathbb{N}, \forall x, x' \in \text{supp}(\mu)^2, \left| \|f_n(x) - f_n(x')\| - \|x - x'\| \right| = o\left(\frac{1}{n}\right)$$



$$\forall s \in \mathbb{R}^p, |\mathcal{F}_{f_n \# \mu}(s) - \mathcal{F}_\nu(s)| = o\left(\frac{1}{n}\right)$$

For  $x, x' \in \text{supp}(\mu)$ :

$$\begin{aligned} \|f_n(x) - f_n(x')\| &= \sum_{k=1}^p |T_{e_k(n)}(\langle x, e_k(n) \rangle) - T_{e_k(n)}(\langle x', e_k(n) \rangle)| \\ &\stackrel{(*)}{=} \sum_{k=1}^p |\langle x, e_k(n) \rangle - \langle x', e_k(n) \rangle| \\ &= \sum_{k=1}^p |\langle x - x', e_k \rangle| \end{aligned}$$

where in (\*) we used  $\mathcal{Q}_{e_k(n)}$  since  $\langle x, e_k(n) \rangle \in \text{supp}(P_{e_k(n)} \# \mu)$  (idem for  $x'$ ). In this way:

$$\begin{aligned} \left| \|f_n(x) - f_n(x')\| - \|x - x'\| \right| &= \left| \sum_{k=1}^p |\langle x - x', e_k(n) \rangle| - |x_k - x'_k| \right| \\ &\leq \sum_{k=1}^p \left| |\langle x - x', e_k(n) \rangle| - |x_k - x'_k| \right| \\ &\leq \sum_{k=1}^p |\langle x - x', e_k(n) \rangle - (x_k - x'_k)| \\ &= \sum_{k=1}^p |R(x - x', e_k(n))| = o\left(\frac{1}{n}\right) \end{aligned}$$

Hence

$$\left| \|f_n(x) - f_n(x')\| - \|x - x'\| \right| = o\left(\frac{1}{n}\right) \quad (16)$$

Moreover we have by definition of the Fourier transform, for  $s \in \mathbb{R}^p$ ,

$$\begin{aligned} \mathcal{F}_{f_n \# \mu}(s) &= \int e^{-2i\pi \langle s, f_n(x) \rangle} d\mu(x) \\ &= \int e^{-2i\pi \sum_{k=1}^p s_k T_{e_k(n)}(\langle x, e_k(n) \rangle)} d\mu(x) \\ &= \prod_{k=1}^p \int e^{-2i\pi s_k T_{e_k(n)}(\langle x, e_k(n) \rangle)} d\mu(x) \end{aligned} \quad (17)$$

Then using  $(\mathcal{Q}_\theta)$  we have for all  $k \in \{1, \dots, p\}$ , and any real  $t \in \mathbb{R}$

$$\begin{aligned} \mathcal{F}_{T_{e_k(n)} \# (P_{e_k(n)} \# \mu)}(t) &= \mathcal{F}_{P_{e_k(n)} \# \nu}(t) \\ \implies \int e^{-2i\pi t T_{e_k(n)}(\langle e_k(n), x \rangle)} d\mu(x) &= \int e^{-2i\pi t \langle e_k(n), y \rangle} d\nu(y) \end{aligned}$$

So by applying this results for  $t = s_k$  we have:

$$\int e^{-2i\pi s_k T_{e_k(n)}(\langle x, e_k(n) \rangle)} d\mu(x) = \int e^{-2i\pi s_k \langle e_k(n), y \rangle} d\nu(y) \quad (18)$$

Combining (18) and (17):

$$\mathcal{F}_{f_n \# \mu}(s) = \prod_{k=1}^p \int e^{-2i\pi s_k \langle e_k(n), y \rangle} d\nu(y) \quad (19)$$

So:

$$\begin{aligned}
|\mathcal{F}_{f_n \# \mu}(s) - \mathcal{F}_\nu(s)| &= \left| \int e^{-2i\pi \langle s, f_n(x) \rangle} d\mu(x) - \int e^{-2i\pi \langle s, y \rangle} d\nu(y) \right| \\
&\stackrel{*}{=} \left| \int e^{-2i\pi \langle s, f_n(x) \rangle} d\mu(x) - \int e^{-2i\pi [\sum_{k=1}^p \langle s, e_k(n) \rangle \langle e_k(n), y \rangle + \tilde{R}(s, y)]} d\nu(y) \right| \\
&\stackrel{**}{=} \left| \prod_{k=1}^p \int e^{-2i\pi s_k \langle e_k(n), y \rangle} d\nu(y) - \int e^{-2i\pi \tilde{R}(s, y)} e^{-2i\pi \sum_{k=1}^p \langle s, e_k(n) \rangle \langle e_k(n), y \rangle} d\nu(y) \right| \\
&= \left| \int e^{-2i\pi \sum_{k=1}^p s_k \langle e_k(n), y \rangle} d\nu(y) - \int e^{-2i\pi \tilde{R}(s, y)} e^{-2i\pi \sum_{k=1}^p \langle s, e_k(n) \rangle \langle e_k(n), y \rangle} d\nu(y) \right| \\
&\stackrel{***}{=} \left| \int e^{-2i\pi \sum_{k=1}^p (\langle s, e_k(n) \rangle + R(s, e_k(n))) \langle e_k(n), y \rangle} d\nu(y) \right. \\
&\quad \left. - \int e^{-2i\pi \tilde{R}(s, y)} e^{-2i\pi \sum_{k=1}^p \langle s, e_k(n) \rangle \langle e_k(n), y \rangle} d\nu(y) \right| \\
&= \left| \int e^{-2i\pi \sum_{k=1}^p R(s, e_k(n)) \langle e_k(n), y \rangle} e^{-2i\pi \sum_{k=1}^p \langle s, e_k(n) \rangle \langle e_k(n), y \rangle} d\nu(y) \right. \\
&\quad \left. - \int e^{-2i\pi \tilde{R}(s, y)} e^{-2i\pi \sum_{k=1}^p \langle s, e_k(n) \rangle \langle e_k(n), y \rangle} d\nu(y) \right| \\
&= \left| \int e^{-2i\pi \sum_{k=1}^p \langle s, e_k(n) \rangle \langle e_k(n), y \rangle} (e^{-2i\pi \sum_{k=1}^p R(s, e_k(n)) \langle e_k(n), y \rangle} - e^{-2i\pi \tilde{R}(s, y)}) d\nu(y) \right| \\
&\leq \int |e^{-2i\pi \sum_{k=1}^p R(s, e_k(n)) \langle e_k(n), y \rangle} - e^{-2i\pi \tilde{R}(s, y)}| d\nu(y) \\
&= \int |e^{-2i\pi \tilde{R}(s, y)} (e^{-2i\pi (\sum_{k=1}^p R(s, e_k(n)) \langle e_k(n), y \rangle - \tilde{R}(s, y))} - 1)| d\nu(y) \\
&\leq \int |e^{-2i\pi (\sum_{k=1}^p R(s, e_k(n)) \langle e_k(n), y \rangle - \tilde{R}(s, y))} - 1| d\nu(y) \\
&= \int |2ie^{-i\pi (\sum_{k=1}^p R(s, e_k(n)) \langle e_k(n), y \rangle - \tilde{R}(s, y))} \sin(\pi (\sum_{k=1}^p R(s, e_k(n)) \langle e_k(n), y \rangle - \tilde{R}(s, y)))| d\nu(y) \\
&\leq \int |\sin(\pi (\sum_{k=1}^p R(s, e_k(n)) \langle e_k(n), y \rangle - \tilde{R}(s, y)))| d\nu(y) \\
&\leq \pi \int (\sum_{k=1}^p |R(s, e_k(n)) \langle e_k(n), y \rangle| + |\tilde{R}(s, y)|) d\nu(y) \\
&\stackrel{****}{=} o\left(\frac{1}{n}\right)
\end{aligned}$$

where in (\*) we used the expression in the new base of the scalar product  $\langle s, y \rangle$ , in (\*\*) we used (19), in (\*\*\*) the expression of  $s_k$  w.r.t the new base and in (\*\*\*\*) the fact that each term is  $o(\frac{1}{n})$ . In this way:

$$|\mathcal{F}_{f_n \# \mu}(s) - \mathcal{F}_\nu(s)| = o\left(\frac{1}{n}\right) \quad (20)$$

□

For the invariance by rotation if  $p = q$  then  $\mathbb{V}_p(\mathbb{R}^p)$  is bijective with  $\mathcal{O}(p)$  so for  $Q \in \mathcal{O}(p)$ :

$$\begin{aligned}
RISGW(Q\#\mu, \nu) &= \min_{\Delta \in \mathbb{V}_p(\mathbb{R}^p)} SGW_{\Delta}(Q\#\mu, \nu) \\
&= \min_{\Delta \in \mathcal{O}(p)} SGW_{\Delta}(Q\#\mu, \nu) \\
&= \min_{\Delta \in \mathcal{O}(p) \theta \sim \lambda_{q-1}} \mathbb{E} [GW(d^2, P_{\theta}\#(\Delta Q\#\mu), P_{\theta}\#\nu)] \\
&= \min_{\Delta' \in \mathcal{O}(p) \theta \sim \lambda_{q-1}} \mathbb{E} [GW(d^2, P_{\theta}\#\Delta'\#\mu, P_{\theta}\#\nu)] \\
&= RISGW(\mu, \nu)
\end{aligned} \tag{21}$$

On the other side for  $\nu$  a change of formula on theta gives the result.

## 5 Algorithm for $SGW$

---

Sliced Gromov-Wasserstein for discrete measures

- 1:  $p < q$ ,  $\mu = \frac{1}{n} \sum_{i=1}^n \delta_{x_i} \in \mathcal{P}(\mathbb{R}^p)$  and  $\nu = \frac{1}{n} \sum_{i=1}^n \delta_{y_j} \in \mathcal{P}(\mathbb{R}^q)$
  - 2:  $\forall i, x_i \leftarrow \Delta(x_i)$ , sample uniformly  $(\theta_l)_{l=1, \dots, L} \in \mathbf{S}^{q-1}$
  - 3: **for**  $l = 1, \dots, L$  **do**
  - 4:     Sort  $(\langle x_i, \theta_l \rangle)_i$  and  $(\langle y_j, \theta_l \rangle)_j$  in increasing order
  - 5:     Solve (1) for reals  $(\langle x_i, \theta_l \rangle)_i$  and  $(\langle y_j, \theta_l \rangle)_j$ ,  $\sigma_{\theta_l}$  is the solution ( $\sigma_{\theta_l} \in \text{Anti-Id or Id}$ )
  - 6: **end for**
  - 7: return  $\frac{1}{n^2 L} \sum_{l=1}^L \sum_{i,k=1}^n (\langle x_i - x_k, \theta_l \rangle^2 - \langle y_{\sigma_{\theta_l}(i)} - y_{\sigma_{\theta_l}(k)}, \theta_l \rangle^2)^2$
- 

In practice, the computation trick presented in Equation (7) can be used to make the complexity of the computation in line 7 linear with  $n$ .

## 6 $SW_{\Delta}$ and $RISW$

Analogously to  $SGW$  we can define for the Sliced-Wasserstein distance  $SW_{\Delta}(\mu, \nu)$  for  $\mu, \nu \in \mathcal{P}(\mathbb{R}^p) \times \mathcal{P}(\mathbb{R}^q)$  with  $p \neq q$  and its rotational invariant counterpart as:

$$\begin{aligned}
SW_{\Delta}(\mu, \nu) &= \int_{\mathbf{S}^{q-1}} SW(P_{\theta}\#\mu_{\Delta}, P_{\theta}\#\nu) d\theta \\
RISW(\mu, \nu) &= \min_{\Delta \in \mathbb{V}_q(\mathbb{R}^p)} SW_{\Delta}(\mu, \nu)
\end{aligned} \tag{22}$$

where  $SW$  is the Sliced-Wasserstein distance. The complexity for computing  $SW_{\Delta}$  is  $O(Ln(p + q + \log(n)))$  which is exactly the same complexity as  $SGW_{\Delta}$ . With these formulations, we can perform the same experiment as for  $RISGW$  on the spiral dataset. The optimisation on the Stiefel manifold is performed using Pymanopt as for  $SGW$ . Results are reported in Figure 1. As one can see,  $RISW$  is rotational invariant on average whereas  $SW$  is not. One can also note that, due to the sampling process of the spiral dataset, the variance is quite large. This can be explained by the fact that, unlike  $SGW$ , the Sliced-Wasserstein may realign the distributions without taking the rotation into account.

## 7 Supplementary results for the $SGW$ GAN Section

We give here supplementary results for the  $SGW$  GAN experiment in Fig. 2, where we consider first a generator that outputs 2D samples, with a two dimensional target, and then a generator that generates 3D samples from a 2D target distribution. Here again, the results are reported for 1000 epochs.

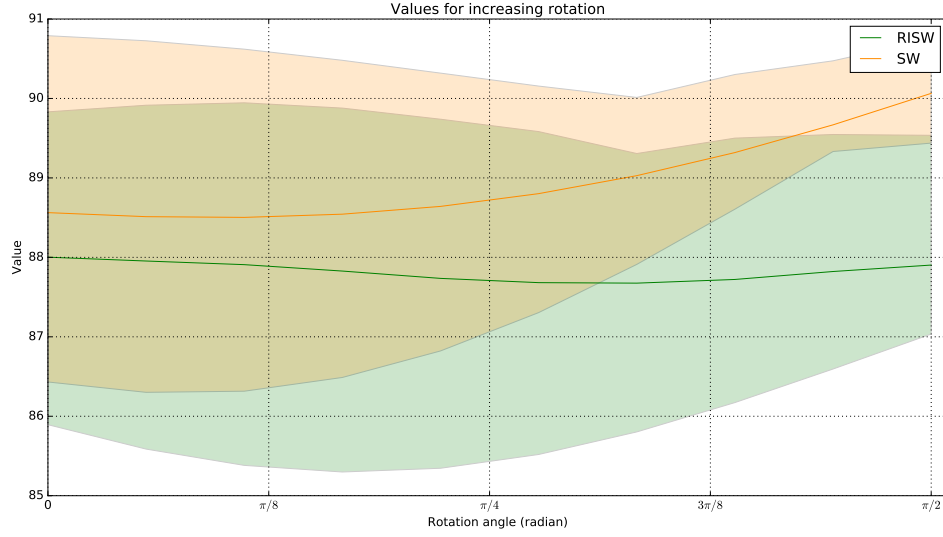

Figure 1: Illustration of  $SW$ ,  $RISW$  on spiral datasets for varying rotations on discrete 2D spiral datasets. (left) Examples of spiral distributions for source and target with different rotations. (right) Average value of  $SW$  and  $RISW$  with  $L = 20$  as a function of rotation angle of the target. Colored areas correspond to the 20% and 80% percentiles.

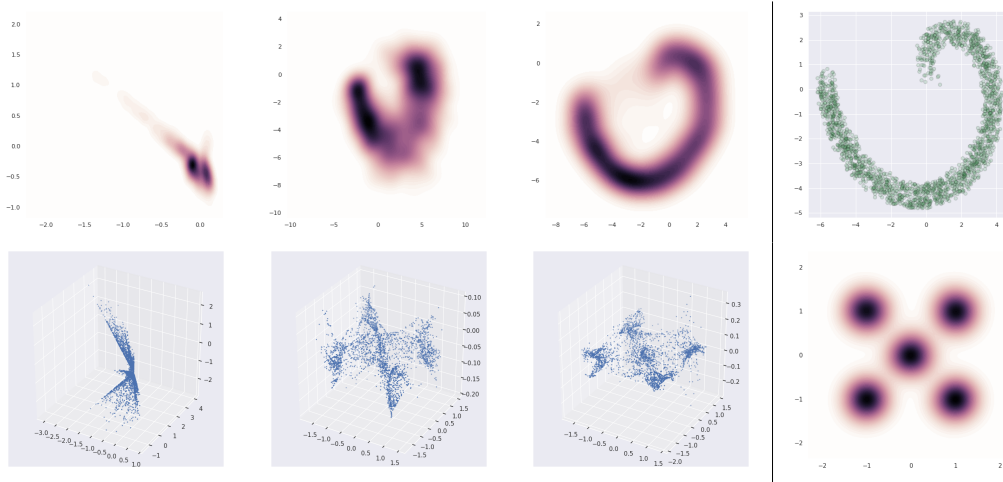

Figure 2: Using  $SGW$  in a GAN loss. The three rows depicts three different examples. First row is 2D (Generator) to 2D (Target), Second 3D to 2D. First column is initialization, second one is at 100 Epochs, third one at 1000. Last column depicts the target distribution.

## References

- [1] F. Memoli. “Gromov Wasserstein Distances and the Metric Approach to Object Matching”. In: *Foundations of Computational Mathematics* (2011), pp. 1–71.
- [2] H. Maron and Y. Lipman. “(Probably) Concave Graph Matching”. In: *Advances in Neural Information Processing Systems 31*. Ed. by S. Bengio et al. Curran Associates, Inc., 2018, pp. 408–418.
